# Supplementary material for: A Tale of Toxin Promiscuity: The Versatile Pharmacological Effects of Hcr 1b-2 Sea Anemone Peptide on Voltage-Gated Ion Channels
Source: MDPI journal article supplement (doi:10.3390/md20020147), 2022-02-17
Supplement: s1 [file s1]

## A tale of toxin promiscuity: The versatile pharmacological effects of Hcr 1b-2 sea anemone peptide on voltage-gated ion channels

Ernesto Lopes Pinheiro-Junior<sup>1\*</sup>, Rimma Kalina<sup>2</sup>, Irina Gladkikh<sup>2</sup>, Elena Leychenko<sup>2</sup>, Jan Tytgat<sup>1\*</sup>, Steve Peigneur<sup>1\*</sup>

### Supplementary material

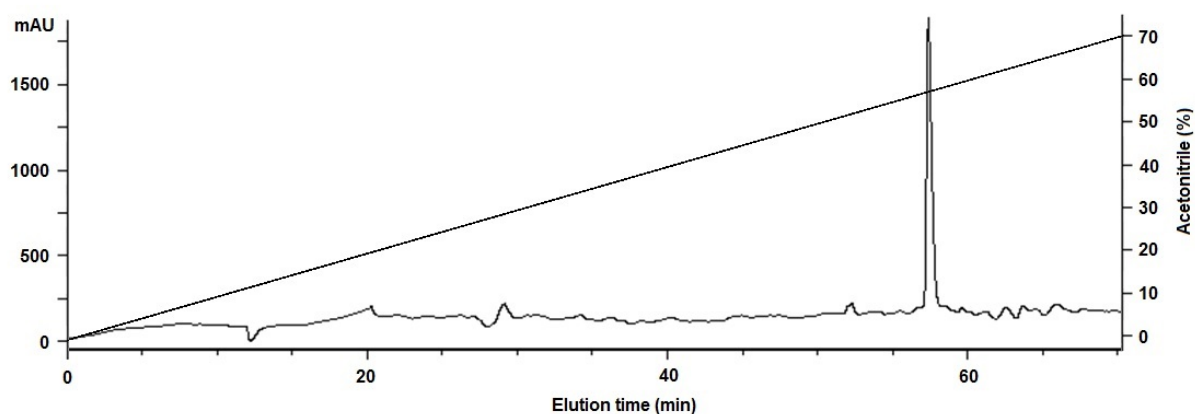

**Figure S1.** RP-HPLC performed on a Luna C18 column (10 × 250 mm, Phenomenex, USA), equilibrated with 10% acetonitrile solution in 0.1% trifluoroacetic acid (TFA) on an Agilent 1100 chromatograph (Agilent Technologies, USA). Elution was carried out in a linear gradient of acetonitrile concentration from 0 to 70% in 0.1 % trifluoroacetic acid, for 70 minutes. Flow rate: 1.5 mL/min.

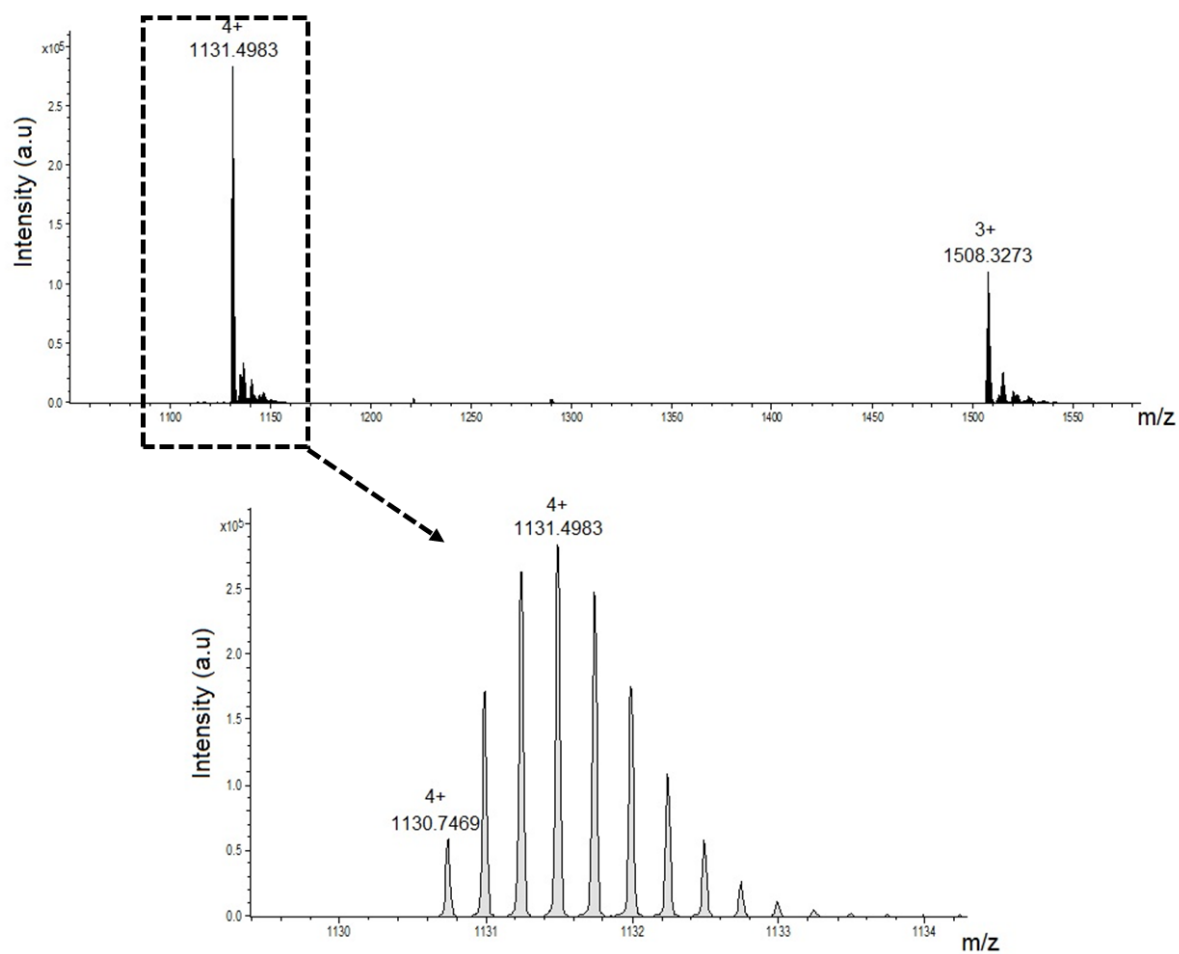

**Figure S2.** ESI mass spectrum of Hcr 1b-2. Calculated average and monoisotopic molecular masses are 4522.3206 and 4519.0042 Da, measured 4521.9614 and 4518.9564 Da, respectively.
